# Supplementary material for: Respective Contributions of URT1 and HESO1 to the Uridylation of 5′ Fragments Produced From RISC-Cleaved mRNAs
Source: Front Plant Sci. 2018 Oct 9;9:1438. doi: 10.3389/fpls.2018.01438 (PMC6191825; doi:10.3389/fpls.2018.01438)
Supplement: TABLE S3 — Exhaustive list of extensions found by 3′ RACE-seq for MYB33 5′-cleavage fragments in WT for four biological replicates from dataset #1. [file Table_3.XLSX]

## Sheet: counting.txt
Supplementary Table 3. Exhaustive list of extensions found by 3’ RACE-seq for MYB33 5'-cleavage fragments in WT for four biological replicates (dataset #1). Extensions are sorted by nucleotide composition and then by frequency.
Rep 1			Rep 2			Rep 3			Rep 4
Total number of sequences that map at position 0: 3247			Total number of sequences that map at position 0: 9778			Total number of sequences that map at position 0: 3868			Total number of sequences that map at position 0: 2851
Tail	Read number		Tail	Read number		Tail	Read number		Tail	Read number
TTTTTT	717		TTTTT	1380		TTTT	1516		TT	679
T	608		TA	1237		TTTTT	915		TTT	452
TTTTT	275		T	1006		TT	817		TTTTA	434
TT	256		TTT	932		TA	413		TTTTTTTC	250
TTTT	250		TTTT	869		TTTTTCTGACC	31		TTTCTTTTTT	187
TTTTTTT	216		TTTTTTT	865		TTTC	13		T	161
TTT	9		TATTC	591		T	11		TTTTT	155
TTTTTC	7		TTTTTC	521		TTT	9		TTTTTTC	20
GTTTTTT	5		TTTTTTTA	519		TTTTC	9		TTTT	8
TA	5		CT	254		TTCTT	6		TTTTTCTC	7
TTTCTT	5		TTTTTT	207		TTTTTTT	6		TTTTTT	5
TTTTCT	4		TTTTC	29		TTCT	5		CT	4
TTTTCTT	4		TTTTTTA	28		TTTTTT	5		TA	4
CTTTT	3		TT	26		TTTTA	4		TTA	4
TTCTTT	3		TTC	11		CTTT	3		TTTTTTT	4
TTGTTTT	3		CTT	8		CTTTT	3		AT	3
AT	2		TTTC	8		TG	3		TTCCTTTTTT	3
CT	2		TG	7		TTTTG	3		TAT	2
TTCTT	2		TATTT	5		CT	2		TTTCTTTTTA	2
TTTCTTTTTT	2		TTTTCTT	5		TTGT	2		TTTTC	2
TTTTA	2		TTTTTTC	5		TTTTTTTA	2		TTTTTTTA	2
TTTTTTTA	2		TTA	4		AT	1		AATTT	1
AATATT	1		TTTA	4		CTTC	1		ATTTTATC	1
ACTTTTG	1		CTTTTTT	3		CTTTC	1		CTT	1
AGTT	1		GTT	3		GT	1		CTTCTGTTAT	1
ATTT	1		TTCT	3		GTTC	1		CTTTC	1
ATTTT	1		TTTAT	3		TATC	1		CTTTT	1
ATTTTTT	1		TTTTA	3		TATTC	1		GTT	1
GCTTTTT	1		TTTTCC	3		TGTT	1		GTTCT	1
TATTC	1		TTTTTA	3		TTGTC	1		GTTTA	1
TATTTT	1		TTTTTCT	3		TTTA	1		GTTTT	1
TGTT	1		TTTTTTTT	3		TTTAT	1		TATCTTTATT	1
TGTTTTC	1		CTTTT	2		TTTCT	1		TATTC	1
TGTTTTT	1		GTTTT	2		TTTCTTTTTT	1		TATTTTTC	1
TTCTC	1		TAT	2		TTTG	1		TGT	1
TTGTT	1		TATTTTT	2		TTTGT	1		TGTATTTTTA	1
TTGTTA	1		TGT	2		TTTTTC	1		TGTCTTCTCT	1
TTGTTAT	1		TTCTT	2		G	1		TGTCTTTTCT	1
TTGTTT	1		TTCTTC	2		A	3		TGTTA	1
TTTAT	1		TTGTT	2		AA	1		TTAATTT	1
TTTC	1		TTTCT	2		CA	1		TTACTTTTTT	1
TTTCTTT	1		TTTCTC	2					TTAGTTGTTG	1
TTTTCC	1		TTTCTTTTTT	2					TTCAT	1
TTTTGT	1		TTTTAC	2					TTCTA	1
TTTTGTT	1		TTTTGTT	2					TTGCTTTTTT	1
TTTTTA	1		TTTTTAA	2					TTGTT	1
TTTTTCT	1		TTTTTCTA	2					TTTA	1
TTTTTTA	1		TTTTTG	2					TTTAA	1
TTTTTTC	1		TTTTTGTA	2					TTTATTTTTT	1
G	2		TTTTTTTC	2					TTTCCTTTTT	1
C	16		TTTTTTTG	2					TTTCGTTTGT	1
CG	1		AGTTTTC	1					TTTCGTTTTT	1
A	442		ATCTTTA	1					TTTCTTTCAA	1
CA	1		ATT	1					TTTCTTTCTT	1
			ATTAT	1					TTTTCTC	1
			ATTATTT	1					TTTTG	1
			ATTTATTA	1					TTTTTC	1
			ATTTTT	1					TTTTTCT	1
			ATTTTTT	1					TTTTTTCC	1
			ATTTTTTA	1					TTTTTTTCCTGACGAAT	1
			CCTTTTTA	1					TGGTG	1
			CTAT	1					C	3
			CTCTCT	1					A	2
			CTTT	1					ATCAA	1
			CTTTTC	1
			CTTTTT	1
			CTTTTTTA	1
			GCTTT	1
			GGTTTT	1
			GTGTT	1
			GTTTATT	1
			GTTTTC	1
			GTTTTCT	1
			GTTTTTG	1
			GTTTTTT	1
			GTTTTTTA	1
			TATT	1
			TATTG	1
			TATTTTTA	1
			TGATT	1
			TGGTTC	1
			TGTGATTA	1
			TGTTG	1
			TGTTT	1
			TGTTTTC	1
			TGTTTTT	1
			TTAG	1
			TTAT	1
			TTATTT	1
			TTCTC	1
			TTCTCT	1
			TTCTTTT	1
			TTCTTTTA	1
			TTG	1
			TTGGTTT	1
			TTGT	1
			TTGTATA	1
			TTGTTAA	1
			TTGTTC	1
			TTGTTCT	1
			TTTAA	1
			TTTATT	1
			TTTATTT	1
			TTTCCC	1
			TTTCCTTTCT	1
			TTTCTGACTC	1
			TTTCTTA	1
			TTTCTTT	1
			TTTCTTTC	1
			TTTGTAA	1
			TTTGTT	1
			TTTTACT	1
			TTTTAGT	1
			TTTTCT	1
			TTTTCTAA	1
			TTTTG	1
			TTTTGA	1
			TTTTGT	1
			TTTTTATA	1
			TTTTTCA	1
			TTTTTTCA	1
			TTTTTTTTA	1
			C	9
			CC	3
			CTC	1
			CTCCCTT	1
			A	37
			CA	7
			GA	3
			AA	2
			AATTA	1
			AC	1
